# Supplementary material
Source: publisher site journal article supplement (https://www.spandidos-publications.com/2977/downloadSupplementary)
Supplement: Supplementary file 1 [file downloadSupplementary]

## Sheet: Sheet1
The list of TF-miRNA-hub gene regulatory pairs
Souce nodes	Target nodes
hsa-miR-433	MAD2L1
hsa-miR-381	KIF11
hsa-miR-181d	MELK
hsa-miR-205	NCAPG
hsa-miR-20a	PBK
hsa-miR-20b	PBK
hsa-miR-302d	PBK
hsa-miR-93	PBK
hsa-miR-106b	PBK
hsa-miR-106a	PBK
hsa-miR-103	KIF23
hsa-miR-107	KIF23
hsa-miR-15a	KIF23
MEF2A	hsa-miR-433
NR3B3	hsa-miR-433
SHP	hsa-miR-433
SMAD3	hsa-miR-433
TGFB1	hsa-miR-433
HNF4A	hsa-miR-381
TP53	hsa-miR-381
EGR1	hsa-miR-181d
RUNX1	hsa-miR-181d
MYCN	hsa-miR-181d
THRA	hsa-miR-181d
BMP4	hsa-miR-205
BRCA1	hsa-miR-205
DEC1	hsa-miR-205
HES1	hsa-miR-205
HIF1A	hsa-miR-205
PCGF2	hsa-miR-205
PKM	hsa-miR-205
RELA	hsa-miR-205
TGFB1	hsa-miR-205
TP53	hsa-miR-205
TP63	hsa-miR-205
TP73	hsa-miR-205
TWIST1	hsa-miR-205
ZEB1	hsa-miR-205
AR	hsa-miR-20a
BMPR1A	hsa-miR-20a
CCND1	hsa-miR-20a
CEBPB	hsa-miR-20a
E2F1	hsa-miR-20a
E2F2	hsa-miR-20a
E2F3	hsa-miR-20a
ELK1	hsa-miR-20a
ESR1	hsa-miR-20a
HES1	hsa-miR-20a
HIF1A	hsa-miR-20a
MAPK14	hsa-miR-20a
MAX	hsa-miR-20a
MNT	hsa-miR-20a
MXI1	hsa-miR-20a
MYC	hsa-miR-20a
MYCN	hsa-miR-20a
NANOG	hsa-miR-20a
NKX2-5	hsa-miR-20a
PIM1	hsa-miR-20a
RELA	hsa-miR-20a
RUNX1	hsa-miR-20a
SMAD3	hsa-miR-20a
SP1	hsa-miR-20a
SPI1	hsa-miR-20a
SREBF2	hsa-miR-20a
STAT3	hsa-miR-20a
STAT5	hsa-miR-20a
TAF15	hsa-miR-20a
TFAP2A	hsa-miR-20a
TLX1	hsa-miR-20a
TLX3	hsa-miR-20a
TP53	hsa-miR-20a
E2F1	hsa-miR-20b
EGR1	hsa-miR-20b
ESR1	hsa-miR-20b
MAX	hsa-miR-20b
MITF	hsa-miR-20b
MYC	hsa-miR-20b
MYCN	hsa-miR-20b
RUNX1	hsa-miR-20b
JMJD1C	hsa-miR-302d
NANOG	hsa-miR-302d
POU5F1	hsa-miR-302d
PTEN	hsa-miR-302d
SMAD1	hsa-miR-302d
SMAD4	hsa-miR-302d
SOX2	hsa-miR-302d
ZFP42	hsa-miR-302d
AHR	hsa-miR-93
ARNT	hsa-miR-93
ATF4	hsa-miR-93
E2F1	hsa-miR-93
JUN	hsa-miR-93
MAX	hsa-miR-93
MYC	hsa-miR-93
MYCN	hsa-miR-93
NFE2L2	hsa-miR-93
SP7	hsa-miR-93
TAZ	hsa-miR-93
TEAD1	hsa-miR-93
YAP1	hsa-miR-93
AHR	hsa-miR-106b
ARNT	hsa-miR-106b
ATF4	hsa-miR-106b
E2F1	hsa-miR-106b
E2F3	hsa-miR-106b
JUN	hsa-miR-106b
MAX	hsa-miR-106b
MYC	hsa-miR-106b
MYCN	hsa-miR-106b
NFE2L2	hsa-miR-106b
TAZ	hsa-miR-106b
TEAD1	hsa-miR-106b
YAP1	hsa-miR-106b
E2F1	hsa-miR-106a
EGR1	hsa-miR-106a
ESR1	hsa-miR-106a
MAX	hsa-miR-106a
MITF	hsa-miR-106a
MYC	hsa-miR-106a
MYCN	hsa-miR-106a
RUNX1	hsa-miR-106a
SP1	hsa-miR-106a
TP53	hsa-miR-106a
HIF1A	hsa-miR-103
ZEB1	hsa-miR-103
ZEB2	hsa-miR-103
HIF1A	hsa-miR-107
LIN28A	hsa-miR-107
PPARA	hsa-miR-107
SREBF1	hsa-miR-107
TP53	hsa-miR-107
ZEB1	hsa-miR-107
ZEB2	hsa-miR-107
E2F1	hsa-miR-15a
E2F3	hsa-miR-15a
E2F7	hsa-miR-15a
KLF4	hsa-miR-15a
MYB	hsa-miR-15a
MYC	hsa-miR-15a
PAX5	hsa-miR-15a
PRKCA	hsa-miR-15a
REPIN1	hsa-miR-15a
STAT3	hsa-miR-15a
STAT5	hsa-miR-15a
TP53	hsa-miR-15a
